# Supplementary material
Source: publisher figshare collection journal article supplement (https://karger.figshare.com/ndownloader/files/38900913)
Supplement: Supplementary file 1 [file 38900913]

S2.List of participating hospitals

|  | **Cases analysed (n)** |
| --- | --- |
| Albert Schweizer ziekenhuis, Dordrecht | 1 |
| Alrijne ziekenhuis, Leiderdorp | 1 |
| Amphia ziekenhuis, Breda | 6 |
| Bernhoven, Uden | 0 |
| Bravis ziekenhuis, Roosendaal | 4 |
| CGOA, Amsterdam | 5 |
| Erasmus MC, Rotterdam | 8 |
| ETZ, Tilburg | 4 |
| Groene Hart Ziekenhuis, Gouda | 1 |
| Ikazia, Rotterdam | 1 |
| MMC, Eindhoven | 1 |
| MST, Twente | 0 |
| RadboudUMC, Nijmegen | 6 |
| RdGG, Delft | 1 |
| RKZ, Beverwijk | 1 |
| Spaarne Gasthuis, Haarlem | 4 |
| Ter Gooi, Blaricum | 2 |
| Treant Zorggroep, Emmen | 1 |
| UMCG, Groningen | 1 |
| UMC Utrecht, Utrecht | 8 |
| WFG, Hoorn | 1 |
| Wilhelmina zh, Assen | 1 |
| ZGT, Hengelo | 1 |
